# Supplementary material for: Color tuning of alternating conjugated polymers composed of pentaazaphenalene by modulating their unique electronic structures involving isolated-LUMOs
Source: Royal Society of Chemistry journal article supplement (doi:10.1039/c6py00685j), 2016-01-01
Supplement: c6py00685j1.pdf [file c6py00685j1.pdf]

## Supporting Information

### **Color Tuning of Alternating Conjugated Polymers Composed of Pentaazaphenylene by Modulating Their Unique Electronic Structures Involving Isolated-LUMOs**

Hiroyuki Watanabe<sup>†</sup>, Masataka Hirose<sup>†</sup>, Kazuyoshi Tanaka<sup>‡</sup>, Kazuo Tanaka<sup>\*†</sup>, and Yoshiki Chujo<sup>\*†</sup>

*<sup>†</sup>Department of Polymer Chemistry, Graduate School of Engineering, Kyoto University, Katsura, Nishikyo-ku, Kyoto 615-8510, Japan*

*<sup>‡</sup>Fukui Institute for Fundamental Chemistry, Kyoto University, 34-4 Nishihiraki-cho, Takano, Sakyo-ku, Kyoto 606-8103 Japan*

kazuo123@chujo.synchem.kyoto-u.ac.jp  
chujo@chujo.synchem.kyoto-u.ac.jp

## General

<sup>1</sup>H (400 MHz) and <sup>13</sup>C (100 MHz) NMR spectra were recorded on JEOL JNM-EX400 or JNM-AL400 spectrometers. <sup>1</sup>H and <sup>13</sup>C spectra used tetramethylsilane (TMS) as an internal standard in CDCl<sub>3</sub>. High-resolution mass spectra (HRMS) were obtained on a Thermo Fisher EXACTIVE for electron spray ionization (ESI). UV-vis absorption spectra were recorded on a Shimadzu UV-3600 spectrophotometer. Fluorescence emission spectra were recorded on a HORIBA JOBIN YVON Fluoromax-4 spectrofluorometer. Gel permeation chromatography (GPC) was carried out on a TOSOH 8020 (TSKgel G3000HXL column) instrument using chloroform as an eluent after calibration with standard polystyrene samples. Cyclic voltammetry (CV) was carried out on a BAS ALS-Electrochemical-Analyzer Model 600D with a glassy carbon working electrode, a Pt counter electrode, an Ag/Ag<sup>+</sup> reference electrode, and the ferrocene/ferrocenium external reference at a scan rate of 0.05 Vs<sup>-1</sup>. All reactions were performed under argon. The films for UV-vis absorption measurement were prepared by spin-coat method using MIKASA Spincoater 1H-D7.

## Materials

All reagents were obtained from commercial sources and used without further purification. 2,7-Bis(4,4,5,5-tetramethyl-1,3,2-dioxaborolan-2-yl)-9,9-didodecylfluorene<sup>1</sup>, 4,4'-didodecyl-2,2'-bithiophene-5,5'-diboronic acid bis(pinacol)ester<sup>2</sup>, 2,5-didodecyloxybenzene-1,4-diboronic acid bis (pinacol)ester<sup>3</sup>, 4,7-bis(4,4,5,5-tetramethyl-1,3,2-dioxaborolan-2-yl)-2,1,3-benzothiadiazole<sup>4</sup>, and 1-perfluorooctyl-4-trifluoromethyl-2,5-dibromobenzene<sup>5</sup> were prepared according to the literatures.

## Synthesis

The copies of the NMR spectra are shown in Figure S1–S10.

*N*-Cyano-*N'*-(6-amino-2-pyridyl)acetamide (1).

A solution of 2,6-diaminopyridine (25 g, 0.23 mol) and methyl *N*-cyanoacetimidate (25 g, 0.26 mol) in 100 mL of degassed glyme was stirred at room temperature for 24 h. A part of the product was precipitated after stirring overnight. After filtration, the precipitate was washed repeatedly with chloroform and ethanol. The filtrate was evaporated *in vacuo*. Then, the residue was washed repeatedly with chloroform and ethanol. The crude was obtained as an off-white powder (27.0 g, 0.15 mol, 67%). <sup>1</sup>H NMR (DMSO-*d*<sub>6</sub>, ppm): 10.62 (s, 1H, NH), 7.45 (t, *J* = 8.0 Hz, 1H, Ar), 7.27 (d, *J* = 7.9 Hz, 1H, Ar), 6.33 (d, *J* = 7.9 Hz, 1H, Ar), 5.96 (s, 2H, NH<sub>2</sub>), 2.47 (s, 3H, Me). <sup>13</sup>C NMR (DMSO-*d*<sub>6</sub>, ppm): 170.7, 158.6, 148.8, 138.9, 116.5, 105.1, 103.0, 21.6. HRMS (p-ESI) calcd. for C<sub>8</sub>H<sub>9</sub>N<sub>5</sub>+H [M+H]<sup>+</sup> 176.0932, found 176.0931.

Tridecanoyl chloride (2).

This compound was synthesized according to the literature with tridecanoic acid (25 g, 117 mmol).<sup>6</sup> The reaction proceeded quantitatively from the <sup>1</sup>H NMR analyses, and the product was used for the subsequent reaction without purification. <sup>1</sup>H NMR (CDCl<sub>3</sub>, ppm): 2.80 (t, 7.3 Hz, 2H, RCH<sub>2</sub>COCl), 1.63 (p, *J* = 7.5 Hz, 2H, R'CH<sub>2</sub>CH<sub>2</sub>COCl), 1.1–1.3 (br m, 18H), 0.80 (t, *J* = 6.5 Hz, 3H, CH<sub>3</sub>).

### 2-Dodecyl-5-methyl-1,3,4,6,9b-pentaazaphenalene (**3**, **5AP-C12**).

The synthesis was performed according to the previous literature<sup>7</sup>. A cold slurry (0 °C) of **1** (4.38 g, 25 mmol) and dehydrated pyridine (1.98 g, 2 mL, 25 mmol) in 35 mL of degassed glyme was stirred. Then, **2** (15 mL, 60 mmol) was added dropwise. After the mixture was refluxed for 4 h, the reaction was quenched by slowly adding methanol and subsequent saturated aqueous sodium hydrogen carbonate. The mixture was extracted with 3 × 50 mL of chloroform. The combined organic layers were washed with water (3 × 100 mL) and brine, and then dried over magnesium sulfate. After filtration, the solvent was removed *in vacuo*. Recrystallization from chloroform and methanol gave **3** as a pink powder (4.92 g, 14 mmol, 56%). <sup>1</sup>H NMR (CD<sub>2</sub>Cl<sub>2</sub>, ppm): 7.16 (t, 1H, Ar), 5.95 (m, 2H, Ar), 1.87 (s, 3H, Ar-CH<sub>3</sub>), 2.08 (t, 2H, Ar-CH<sub>2</sub>), 1.51 (p, *J* = 7.4 Hz, 2H, Ar-CH<sub>2</sub>CH<sub>2</sub>), 1.1–1.3 (m, 18H), 0.80 (t, *J* = 7.1 Hz, 3H, CH<sub>3</sub>). <sup>13</sup>C NMR (CD<sub>2</sub>Cl<sub>2</sub>, ppm): 181.2, 178.0, 160.5, 155.2, 155.1, 146.1, 146.0, 111.2, 110.9, 39.3, 32.3, 30.1, 30.0, 29.9, 29.78, 29.76, 29.6, 26.9, 25.9, 25.8, 23.1, 14.2. HRMS (p-ESI) calc. for C<sub>21</sub>H<sub>31</sub>N<sub>5</sub>+H [M+H]<sup>+</sup> 354.2652, found 354.2649.

### 7,9-Dibromo-2-dodecyl-5-methyl-1,3,4,6,9b-pentaazaphenalene (**4**, **5AP-C12-Br2**).

A solution of **3** (3.35 g, 9 mmol) and of *N*-bromosuccinimide (5.36 g, 30 mmol) in 150 mL of degassed chloroform was refluxed for 3 d. The residual solution was evaporated under vacuum. After column chromatography on silica gel using chloroform as an eluent, followed by recrystallization from chloroform / methanol, the product (2.07 g, 4.05 mmol, 41%) was obtained as a purple powder. <sup>1</sup>H NMR (CD<sub>2</sub>Cl<sub>2</sub>, ppm): 7.85 (s, 1H, Ar), 2.30 (t, *J* = 7.6 Hz, 2H, Ar-CH<sub>2</sub>), 2.09 (s, 3H, Ar-CH<sub>3</sub>), 1.62 (p, *J* = 7.7 Hz, 2H, Ar-CH<sub>2</sub>CH<sub>2</sub>), 1.2–1.4 (m, 18H), 0.88 (t, *J* = 7.2 Hz, 3H, CH<sub>3</sub>). <sup>13</sup>C NMR (CD<sub>2</sub>Cl<sub>2</sub>, ppm): 182.5, 179.3, 160.1, 151.64, 151.56, 151.0, 102.8, 102.4, 39.4, 32.4, 30.08, 30.07, 30.05, 29.9, 29.8, 29.6, 26.8, 26.21, 26.18, 14.3. HRMS (p-ESI) calcd. for C<sub>21</sub>H<sub>29</sub>Br<sub>2</sub>N<sub>5</sub>+H [M+H]<sup>+</sup> 512.0842, found 512.0837.

### 1-Perfluorooctyl-4-trifluoromethylbenzene-2,5-diboronic acid bis(pinacol)ester (**5**).

To a THF (30 mL) solution of 1-perfluorooctyl-4-trifluoromethyl-2,5-dibromobenzene (1.44g, 2 mmol) was slowly added *tert*-BuLi (1.54 M in *n*-pentane, 10.4 mL, 16 mmol) at –78 °C. After stirred for 20 min, 2-isopropoxy-4,4,5,5-tetramethyl-1,3,2-dioxaborolane (3.72 g, 20 mmol) was slowly added to the mixture. The reaction mixture was stirred for an additional 1 h, then allowed to warm to room temperature. After stirring for 22 h at room temperature, the reaction was carefully quenched by water. The mixture was diluted with chloroform, washed with brine and dried over sodium sulfate, and then the solvent was removed under reduced pressure. The crude product was purified with column chromatography on silica gel using hexane/ethyl acetate (40:1) as an eluent. Recrystallization from chloroform/methanol gave the desired product as an off-white solid (0.80 mmol, 40%). <sup>1</sup>H NMR (CDCl<sub>3</sub>, ppm): 7.89 (s, 2H, Ar), 1.37 (s, 12H, Me), 1.36 (s, 12H, Me). <sup>13</sup>C NMR (CDCl<sub>3</sub>, ppm): 136.2 (q, *J* = 32 Hz, C(Ar)-CF<sub>3</sub>), 134.3 (t, *J* = 23 Hz, C(Ar)-CF<sub>2</sub>-), 133.7 (br t, C(Ar)-B, adjacent to C(Ar)-CF<sub>2</sub>-), 130.7 (br q, C(Ar)-B, adjacent to C(Ar)-CF<sub>3</sub>), 125.1 (s, C(Ar)-H), 122.4 (s, C(Ar)-H), 85.0, 84.9, 24.7, 24.6. Other peaks of the fluoroalkyl chains were

not detectable because of the  $^{13}\text{C}$ - $^{19}\text{F}$  coupling. HRMS (p-ESI) calcd. for  $\text{C}_{27}\text{H}_{26}\text{B}_2\text{F}_{20}\text{O}_4+\text{Na}$   $[\text{M}+\text{Na}]^+$  839.1590, found 839.1592.

General polymerization procedure.

Compound **4** (51.13 mg, 0.1 mmol), aryl diboronic acid bis (pinacol)ester (0.1 mmol), tris(dibenzylideneacetone)dipalladium(0) ( $\text{Pd}_2(\text{dba})_3$ , 4.58 mg, 5  $\mu\text{mol}$ ), 2-dicyclohexylphosphino-2',6'-dimethoxybiphenyl (S-Phos, 8.21 mg, 0.02 mmol) and cesium carbonate (325 mg, 1.0 mmol) were dissolved in toluene (2.0 mL) and  $\text{H}_2\text{O}$  (2.0 mL). After stirred at 85 °C for 3 d, the mixture was diluted with toluene, and the polymeric products were isolated by reprecipitation into methanol.

5AP-co-FL.

A purple solid, 89% yield.  $M_n = 8,600$ ,  $M_w / M_n = 3.7$ .

$^1\text{H}$  NMR ( $\text{CD}_2\text{Cl}_2$ , ppm): 7.73–7.71 (br d, 2H, Ar-*H* of fluorene(FL)), 7.67–7.64 (br d, 2H, Ar-*H* of FL), 7.60 (br, 2H, Ar-*H* of FL), 7.43 (br, 1H, Ar-*H* of 5AP), 2.19 (br, 2H, Ar- $\text{CH}_2$  of 5AP), 1.97 (br, 3H, Ar- $\text{CH}_3$  of 5AP), 1.9 (br, 4H, Ar- $\text{CH}_2$  of FL), 1.5 (br, 2H, Ar- $\text{CH}_2\text{-CH}_2$  of 5AP), 1.3–0.9 (br, 58H, alkyl chains of FL and 5AP), 0.86 (br t, 6H,  $-\text{CH}_3$  of FL), 0.74 (br, 3H,  $-\text{CH}_3$  of 5AP). Coupling constants were not calculated due to severely broadened peaks.

5AP-co-Bithio.

A green solid was obtained quantitatively.  $M_n = 5,800$ ,  $M_w / M_n = 1.9$ .

$^1\text{H}$  NMR ( $\text{CD}_2\text{Cl}_2$ , ppm): 7.49 (br, 2H Ar-*H* of bithiophene(Bithio)), 7.32 (br, 1H, Ar-*H* of 5AP), 2.54 (br, 4H Ar- $\text{CH}_2$  of Bithio), 2.38 (br, 2H, Ar- $\text{CH}_2$  of 5AP), 2.13 (br, 3H, Ar- $\text{CH}_3$  of 5AP), 1.71 (br, 2H, Ar- $\text{CH}_2\text{-CH}_2$  of 5AP), 1.3–1.0 (br, 58H, alkyl chains of Bithio and 5AP), 0.86 (br, 9H,  $-\text{CH}_3$  of Bithio and 5AP).

5AP-co-OC10.

A purple solid, 89% yield.  $M_n = 6,200$ ,  $M_w / M_n = 1.9$ .

$^1\text{H}$  NMR ( $\text{CD}_2\text{Cl}_2$ , ppm): 7.46 (br, 1H, Ar-*H* of 5AP), 6.8 (br m, 2H, Ar-*H* of 1,4-didecyloxybenzene( $\text{OC}_{10}$ )), 3.86 (br, 4H, Ar- $\text{CH}_2$  of  $\text{OC}_{10}$ ), 2.17 (br, 2H, Ar- $\text{CH}_2$  of 5AP), 1.97 (br, 3H, Ar- $\text{CH}_3$  of 5AP), 1.71 (br, 4H, Ar- $\text{CH}_2\text{-CH}_2$  of  $\text{OC}_{10}$ ), 1.5 (br, 2H, Ar- $\text{CH}_2\text{-CH}_2$  of 5AP), 1.4–1.0 (br, 46H, alkyl chains of  $\text{OC}_{10}$  and 5AP), 0.86 (br, 9H,  $-\text{CH}_3$  of  $\text{OC}_{10}$  and 5AP).

5AP-co-BThZ.

A brown solid, 90% yield.  $M_n = 3,800$ ,  $M_w / M_n = 1.5$ .

$^1\text{H}$  NMR ( $\text{CD}_2\text{Cl}_2$ , ppm): 7.90 (br, 2H, Ar-*H* of 2,1,3-benzothiadiazole), 7.37 (br, 1H, Ar-*H* of 5AP), 2.15 (br, 2H, Ar- $\text{CH}_2$  of 5AP), 1.95 (br, 3H, Ar- $\text{CH}_3$  of 5AP), 1.6 (br, 2H, Ar- $\text{CH}_2\text{-CH}_2$  of 5AP), 1.2–1.0 (br, 18H, alkyl chain of 5AP), 0.87 (br, 3H,  $-\text{CH}_3$  of 5AP).

5AP-co-CF3.

A purple solid, 62% yield.  $M_n = 8,100$ ,  $M_w / M_n = 3.0$ .

$^1\text{H NMR}$  ( $\text{CD}_2\text{Cl}_2$ , ppm): 7.60 (br, 2H, Ar-*H* of fluoroalkylbenzene), 7.21 (br, 1H, Ar-*H* of 5AP), 2.1–1.7 (br, 5H, Ar- $\text{CH}_3$  of 5AP and Ar- $\text{CH}_2$  of 5AP), 1.42 (br, 2H, Ar- $\text{CH}_2$ - $\text{CH}_2$  of 5AP), 1.3–1.0 (br, 18H, alkyl chain of 5AP), 0.87 (br, 3H, - $\text{CH}_3$  of 5AP).

## References

1. Hai, J.; Zhu, E.; Bian, L.; Wang, J.; Wang, Z.; Li, Y.; Yin, L.; Zhang, F.; Tang, W. *Eur. Polym. J.* **2013**, *49*, 3610–3618.
2. Yoshii, R.; Tanaka, K.; Chujo, Y. *Macromolecules* **2014**, *47*, 2268–2278.
3. Zhu, Y.; Champion, R. D.; Jenekhe, S. A. *Macromolecules* **2006**, *39*, 8712–8719.
4. Zhang, M.; Tsao, H. N.; Pisula, W.; Yang, C.; Mishra, A. K.; Müllen, K. *J. Am. Chem. Soc.* **2007**, *129*, 3472–3473.
5. Kim, Y.; Whitten, J. E.; Swager, T. M. *J. Am. Chem. Soc.* **2005**, *127*, 12122–12130.
6. Ogihara, K and Takayama, Y. Eur. Pat. Appl., 839515, 06 May 1998.
7. Shaw, J. T.; O'Connor, M. E.; Allen, R. C.; Westler, W. M.; Stefanko, B. D. *J. Heterocycl. Chem.* **1974**, *11*, 627–630.
8. Gaussian 09, Revision D.01, Frisch, M. J.; Trucks, G. W.; Schlegel, H. B.; Scuseria, G. E.; Robb, M. A.; Cheeseman, J. R.; Scalmani, G.; Barone, V.; Mennucci, B.; Petersson, G. A.; Nakatsuji, H.; Caricato, M.; Li, X.; Hratchian, H. P.; Izmaylov, A. F.; Bloino, J.; Zheng, G.; Sonnenberg, J. L.; Hada, M.; Ehara, M.; Toyota, K.; Fukuda, R.; Hasegawa, J.; Ishida, M.; Nakajima, T.; Honda, Y.; Kitao, O.; Nakai, H.; Vreven, T.; Montgomery, J. A., Jr.; Peralta, J. E.; Ogliaro, F.; Bearpark, M.; Heyd, J. J.; Brothers, E.; Kudin, K. N.; Staroverov, V. N.; Kobayashi, R.; Normand, J.; Raghavachari, K.; Rendell, A.; Burant, J. C.; Iyengar, S. S.; Tomasi, J.; Cossi, M.; Rega, N.; Millam, J. M.; Klene, M.; Knox, J. E.; Cross, J. B.; Bakken, V.; Adamo, C.; Jaramillo, J.; Gomperts, R.; Stratmann, R. E.; Yazyev, O.; Austin, A. J.; Cammi, R.; Pomelli, C.; Ochterski, J. W.; Martin, R. L.; Morokuma, K.; Zakrzewski, V. G.; Voth, G. A.; Salvador, P.; Dannenberg, J. J.; Dapprich, S.; Daniels, A. D.; Farkas, Ö.; Foresman, J. B.; Ortiz, J. V.; Cioslowski, J.; Fox, D. J. Gaussian, Inc., Wallingford CT, 2009.

**Table S1.** TD-DFT calculation<sup>a</sup> result of FL

| Excited State | Excitation Energy<br>(Wavelength) | Assignment with Weight <sup>b</sup> | Oscillator Strength <i>f</i> |
|---------------|-----------------------------------|-------------------------------------|------------------------------|
| 1             | 2.1955 eV<br>(564.73 nm)          | HOMO-2 → LUMO 0.018550              | 0.0383                       |
|               |                                   | HOMO → LUMO 0.468184                |                              |
| 2             | 3.0892 eV<br>(401.34 nm)          | HOMO-1 → LUMO 0.487735              | 0.0054                       |
| 3             | 3.3481 eV<br>(370.31 nm)          | HOMO → LUMO+1 0.492593              | 0.4961                       |
| 4             | 3.3636 eV<br>(368.61 nm)          | HOMO-2 → LUMO 0.457544              | 0.0451                       |
|               |                                   | HOMO → LUMO 0.021913                |                              |
| 5             | 3.4871 eV<br>(355.55 nm)          | HOMO-2 → LUMO 0.010254              | 0.2775                       |
|               |                                   | HOMO → LUMO+2 0.470226              |                              |
| 6             | 3.6627 eV<br>(338.50 nm)          | HOMO-7 → LUMO 0.180447              | 0.0019                       |
|               |                                   | HOMO-5 → LUMO 0.094735              |                              |
|               |                                   | HOMO-3 → LUMO 0.185959              |                              |
| 7             | 3.7648 eV<br>(329.33 nm)          | HOMO-8 → LUMO 0.048435              | 0.4094                       |
|               |                                   | HOMO-6 → LUMO 0.014390              |                              |
|               |                                   | HOMO-4 → LUMO 0.019379              |                              |
|               |                                   | HOMO-1 → LUMO+1<br>0.079332         |                              |
|               |                                   | HOMO → LUMO+3 0.317792              |                              |
| 8             | 3.7710 eV<br>(328.78 nm)          | HOMO-8 → LUMO 0.164349              | 0.0033                       |
|               |                                   | HOMO-6 → LUMO 0.055089              |                              |
|               |                                   | HOMO-4 → LUMO 0.071353              |                              |
|               |                                   | HOMO-1 → LUMO+1<br>0.029070         |                              |
|               |                                   | HOMO → LUMO+3 0.145687              |                              |
| 9             | 3.8128 eV<br>(325.18 nm)          | HOMO-8 → LUMO 0.037465              | 0.3030                       |
|               |                                   | HOMO-6 → LUMO 0.020521              |                              |
|               |                                   | HOMO-4 → LUMO 0.027872              |                              |

|    |             |                 |          |
|----|-------------|-----------------|----------|
|    |             | HOMO-1 → LUMO+1 |          |
|    |             | 0.378643        |          |
|    |             | HOMO → LUMO+3   | 0.022100 |
| 10 | 3.9815 eV   | HOMO-8 → LUMO   | 0.196373 |
|    | (311.40 nm) | HOMO-6 → LUMO   | 0.059370 |
|    |             | HOMO-4 → LUMO   | 0.208493 |

<sup>a</sup> All TD-DFT calculations were performed at B3LYP/6-31G++(d) level using Gaussian 09 software package<sup>8</sup>.

<sup>b</sup> Square of CI expansion coefficient.

**Table S2.** TD-DFT calculation result of **Bithio**

| Excited State | Excitation Energy<br>(Wavelength) | Assignment with Weight      | Oscillator Strength $f$ |
|---------------|-----------------------------------|-----------------------------|-------------------------|
| 1             | 2.0686 eV<br>(599.37 nm)          | HOMO → LUMO 0.474005        | 0.0464                  |
|               |                                   | HOMO → LUMO+2 0.011396      |                         |
| 2             | 3.0476 eV<br>(406.82 nm)          | HOMO-1 → LUMO 0.486060      | 0.0065                  |
| 3             | 3.1871 eV<br>(389.01 nm)          | HOMO → LUMO+1 0.455787      | 0.5467                  |
|               |                                   | HOMO → LUMO+2 0.031195      |                         |
| 4             | 3.1955 eV<br>(388.00 nm)          | HOMO → LUMO+1 0.032227      | 0.2190                  |
|               |                                   | HOMO → LUMO+2 0.441401      |                         |
| 5             | 3.4181 eV<br>(362.69 nm)          | HOMO-8 → LUMO 0.032368      | 0.0092                  |
|               |                                   | HOMO-2 → LUMO 0.448203      |                         |
| 6             | 3.6076 eV<br>(343.67 nm)          | HOMO-9 → LUMO 0.095339      | 0.0108                  |
|               |                                   | HOMO-7 → LUMO 0.086648      |                         |
|               |                                   | HOMO-6 → LUMO 0.047428      |                         |
|               |                                   | HOMO-5 → LUMO 0.093697      |                         |
|               |                                   | HOMO-4 → LUMO 0.149994      |                         |
| 7             | 3.6213 eV<br>(342.37 nm)          | HOMO-10 → LUMO 0.015540     | 0.0374                  |
|               |                                   | HOMO-8 → LUMO 0.023180      |                         |
|               |                                   | HOMO-7 → LUMO 0.020658      |                         |
|               |                                   | HOMO-6 → LUMO 0.024643      |                         |
|               |                                   | HOMO-5 → LUMO 0.107741      |                         |
|               |                                   | HOMO-4 → LUMO 0.080055      |                         |
|               |                                   | HOMO-3 → LUMO 0.060974      |                         |
|               |                                   | HOMO-1 → LUMO+1<br>0.143732 |                         |
| 8             | 3.6272 eV<br>(341.82 nm)          | HOMO-5 → LUMO 0.014144      | 0.0216                  |
|               |                                   | HOMO-3 → LUMO 0.390838      |                         |
|               |                                   | HOMO-1 → LUMO+1<br>0.056103 |                         |
| 9             | 3.6838 eV                         | HOMO-7 → LUMO 0.012168      | 0.2013                  |



|    |                          |                        |        |
|----|--------------------------|------------------------|--------|
|    | (336.56 nm)              | HOMO-6 → LUMO 0.042308 |        |
|    |                          | HOMO-5 → LUMO 0.076469 |        |
|    |                          | HOMO-4 → LUMO 0.082329 |        |
|    |                          | HOMO-1 → LUMO+1        |        |
|    |                          | 0.256532               |        |
| 10 | 3.8015 eV<br>(326.14 nm) | HOMO-9 → LUMO 0.253603 | 0.0323 |
|    |                          | HOMO-8 → LUMO 0.049093 |        |
|    |                          | HOMO-5 → LUMO 0.081179 |        |
|    |                          | HOMO-4 → LUMO 0.058404 |        |
|    |                          | HOMO-3 → LUMO 0.013426 |        |
|    |                          | HOMO → LUMO+3 0.012419 |        |

**Table S3.** TD-DFT calculation result of **OC10**

| Excited State | Excitation Energy<br>(Wavelength) | Assignment with Weight                                                                                         | Oscillator Strength $f$ |
|---------------|-----------------------------------|----------------------------------------------------------------------------------------------------------------|-------------------------|
| 1             | 2.3210 eV<br>(534.19 nm)          | HOMO-2 $\rightarrow$ LUMO 0.018635<br>HOMO $\rightarrow$ LUMO 0.469362                                         | 0.0152                  |
| 2             | 2.9919 eV<br>(414.40 nm)          | HOMO-1 $\rightarrow$ LUMO 0.496546                                                                             | 0.0007                  |
| 3             | 3.0414 eV<br>(407.66 nm)          | HOMO-2 $\rightarrow$ LUMO 0.475741<br>HOMO $\rightarrow$ LUMO 0.019971                                         | 0.0015                  |
| 4             | 3.6380 eV<br>(340.80 nm)          | HOMO-5 $\rightarrow$ LUMO 0.076049<br>HOMO-3 $\rightarrow$ LUMO 0.347074<br>HOMO $\rightarrow$ LUMO+1 0.062565 | 0.0328                  |
| 5             | 3.6902 eV<br>(335.99 nm)          | HOMO-5 $\rightarrow$ LUMO 0.028839<br>HOMO-3 $\rightarrow$ LUMO 0.038632<br>HOMO $\rightarrow$ LUMO+1 0.406840 | 0.2835                  |
| 6             | 3.7048 eV<br>(334.66 nm)          | HOMO $\rightarrow$ LUMO+2 0.471406                                                                             | 0.1143                  |
| 7             | 3.8575 eV<br>(321.41 nm)          | HOMO-6 $\rightarrow$ LUMO 0.168995<br>HOMO-4 $\rightarrow$ LUMO 0.300896                                       | 0.0002                  |
| 8             | 3.8672 eV<br>(320.61 nm)          | HOMO-1 $\rightarrow$ LUMO+1 0.489272                                                                           | 0.0451                  |
| 9             | 3.9674 eV<br>(312.51 nm)          | HOMO-2 $\rightarrow$ LUMO+1 0.385902<br>HOMO-1 $\rightarrow$ LUMO+2 0.097888                                   | 0.0059                  |
| 10            | 3.9846 eV<br>(311.16 nm)          | HOMO-2 $\rightarrow$ LUMO+1 0.089413<br>HOMO-1 $\rightarrow$ LUMO+2 0.395176                                   | 0.0121                  |

**Table S4.** TD-DFT calculation result of **BThZ**

| Excited State          | Excitation Energy<br>(Wavelength) | Assignment with Weight   | Oscillator Strength $f$ |
|------------------------|-----------------------------------|--------------------------|-------------------------|
| 1                      | 2.3241 eV<br>(533.47 nm)          | HOMO → LUMO 0.056017     | 0.0340                  |
|                        |                                   | HOMO → LUMO+1 0.093673   |                         |
|                        |                                   | HOMO → LUMO+2 0.334535   |                         |
| 2                      | 2.4981 eV<br>(496.32 nm)          | HOMO → LUMO 0.432780     | 0.0821                  |
|                        |                                   | HOMO → LUMO+1 0.034969   |                         |
|                        |                                   | HOMO → LUMO+2 0.028328   |                         |
| 3                      | 2.5498 eV<br>(486.25 nm)          | HOMO → LUMO+1 0.367551   | 0.0199                  |
|                        |                                   | HOMO → LUMO+2 0.122038   |                         |
| 4                      | 3.5340 eV<br>(350.83 nm)          | HOMO-1 → LUMO 0.438072   | 0.0348                  |
|                        |                                   | HOMO-1 → LUMO+2 0.032580 |                         |
| 5                      | 3.5874 eV<br>(345.61 nm)          | HOMO-3 → LUMO+2 0.040913 | 0.0358                  |
|                        |                                   | HOMO-2 → LUMO+2 0.020301 |                         |
|                        |                                   | HOMO-1 → LUMO 0.042770   |                         |
|                        |                                   | HOMO-1 → LUMO+1 0.185614 |                         |
|                        |                                   | HOMO-1 → LUMO+2 0.169736 |                         |
| 6                      | 3.6735 eV<br>(337.51 nm)          | HOMO-3 → LUMO+2 0.022082 | 0.0723                  |
|                        |                                   | HOMO-1 → LUMO+1 0.268272 |                         |
|                        |                                   | HOMO-1 → LUMO+2 0.142793 |                         |
|                        |                                   | HOMO → LUMO+3 0.030909   |                         |
| 7                      | 3.7023 eV<br>(334.89 nm)          | HOMO-2 → LUMO 0.010994   | 0.0864                  |
|                        |                                   | HOMO-2 → LUMO+2 0.027400 |                         |
|                        |                                   | HOMO-1 → LUMO+1 0.025370 |                         |
|                        |                                   | HOMO → LUMO+3 0.340764   |                         |
|                        |                                   | HOMO → LUMO+4 0.055079   |                         |
| 8                      | 3.7720 eV<br>(328.70 nm)          | HOMO-3 → LUMO+2 0.026507 | 0.0958                  |
|                        |                                   | HOMO-2 → LUMO 0.253643   |                         |
|                        |                                   | HOMO-2 → LUMO+1 0.022350 |                         |
|                        |                                   | HOMO-2 → LUMO+2 0.043152 |                         |
|                        |                                   | HOMO-1 → LUMO+2 0.044243 |                         |
|                        |                                   | HOMO → LUMO+3 0.057576   |                         |
| HOMO → LUMO+4 0.016025 |                                   |                          |                         |
| 9                      | 3.8058 eV<br>(325.78 nm)          | HOMO-5 → LUMO+2 0.032512 | 0.1674                  |
|                        |                                   | HOMO-4 → LUMO+2 0.015969 |                         |

|    |             |                          |        |
|----|-------------|--------------------------|--------|
|    |             | HOMO-3 → LUMO 0.011662   |        |
|    |             | HOMO-3 → LUMO+1 0.010028 |        |
|    |             | HOMO-3 → LUMO+2 0.086084 |        |
|    |             | HOMO-2 → LUMO 0.011453   |        |
|    |             | HOMO-1 → LUMO+2 0.030695 |        |
|    |             | HOMO → LUMO+3 0.014578   |        |
|    |             | HOMO → LUMO+4 0.245491   |        |
| 10 | 3.8250 eV   | HOMO-6 → LUMO+2 0.029255 | 0.0530 |
|    | (324.14 nm) | HOMO-5 → LUMO+2 0.070135 |        |
|    |             | HOMO-4 → LUMO+1 0.020079 |        |
|    |             | HOMO-4 → LUMO+2 0.128357 |        |
|    |             | HOMO-3 → LUMO 0.019488   |        |
|    |             | HOMO-2 → LUMO+1 0.065669 |        |
|    |             | HOMO-2 → LUMO+2 0.035153 |        |
|    |             | HOMO → LUMO+4 0.057730   |        |

**Table S5.** TD-DFT calculation result of **CF3**

| Excited State | Excitation Energy<br>(Wavelength) | Assignment with Weight                                                                                           | Oscillator Strength $f$ |
|---------------|-----------------------------------|------------------------------------------------------------------------------------------------------------------|-------------------------|
| 1             | 2.4260 eV<br>(511.07 nm)          | HOMO $\rightarrow$ LUMO 0.487679                                                                                 | 0.0102                  |
| 2             | 3.4937 eV<br>(354.88 nm)          | HOMO $\rightarrow$ LUMO+1 0.476445<br>HOMO $\rightarrow$ LUMO+4 0.011535                                         | 0.0703                  |
| 3             | 3.5976 eV<br>(344.63 nm)          | HOMO $\rightarrow$ LUMO+2 0.493239                                                                               | 0.0123                  |
| 4             | 3.6981 eV<br>(335.26 nm)          | HOMO-3 $\rightarrow$ LUMO 0.020575<br>HOMO-1 $\rightarrow$ LUMO 0.459223                                         | 0                       |
| 5             | 3.8107 eV<br>(325.36 nm)          | HOMO-2 $\rightarrow$ LUMO 0.466434                                                                               | 0.0005                  |
| 6             | 3.9130 eV<br>(316.85 nm)          | HOMO-7 $\rightarrow$ LUMO 0.015528<br>HOMO $\rightarrow$ LUMO+3 0.464020                                         | 0.1626                  |
| 7             | 4.0066 eV<br>(309.45 nm)          | HOMO $\rightarrow$ LUMO+4 0.307637<br>HOMO $\rightarrow$ LUMO+5 0.186477                                         | 0.0389                  |
| 8             | 4.1319 eV<br>(300.06 nm)          | HOMO $\rightarrow$ LUMO+6 0.493731                                                                               | 0.0015                  |
| 9             | 4.2417 eV<br>(292.30 nm)          | HOMO $\rightarrow$ LUMO+1 0.016471<br>HOMO $\rightarrow$ LUMO+4 0.161942<br>HOMO $\rightarrow$ LUMO+5 0.293233   | 0.2040                  |
| 10            | 4.5596 eV<br>(271.92 nm)          | HOMO-3 $\rightarrow$ LUMO 0.306429<br>HOMO-1 $\rightarrow$ LUMO 0.028016<br>HOMO-1 $\rightarrow$ LUMO+3 0.132110 | 0.0168                  |

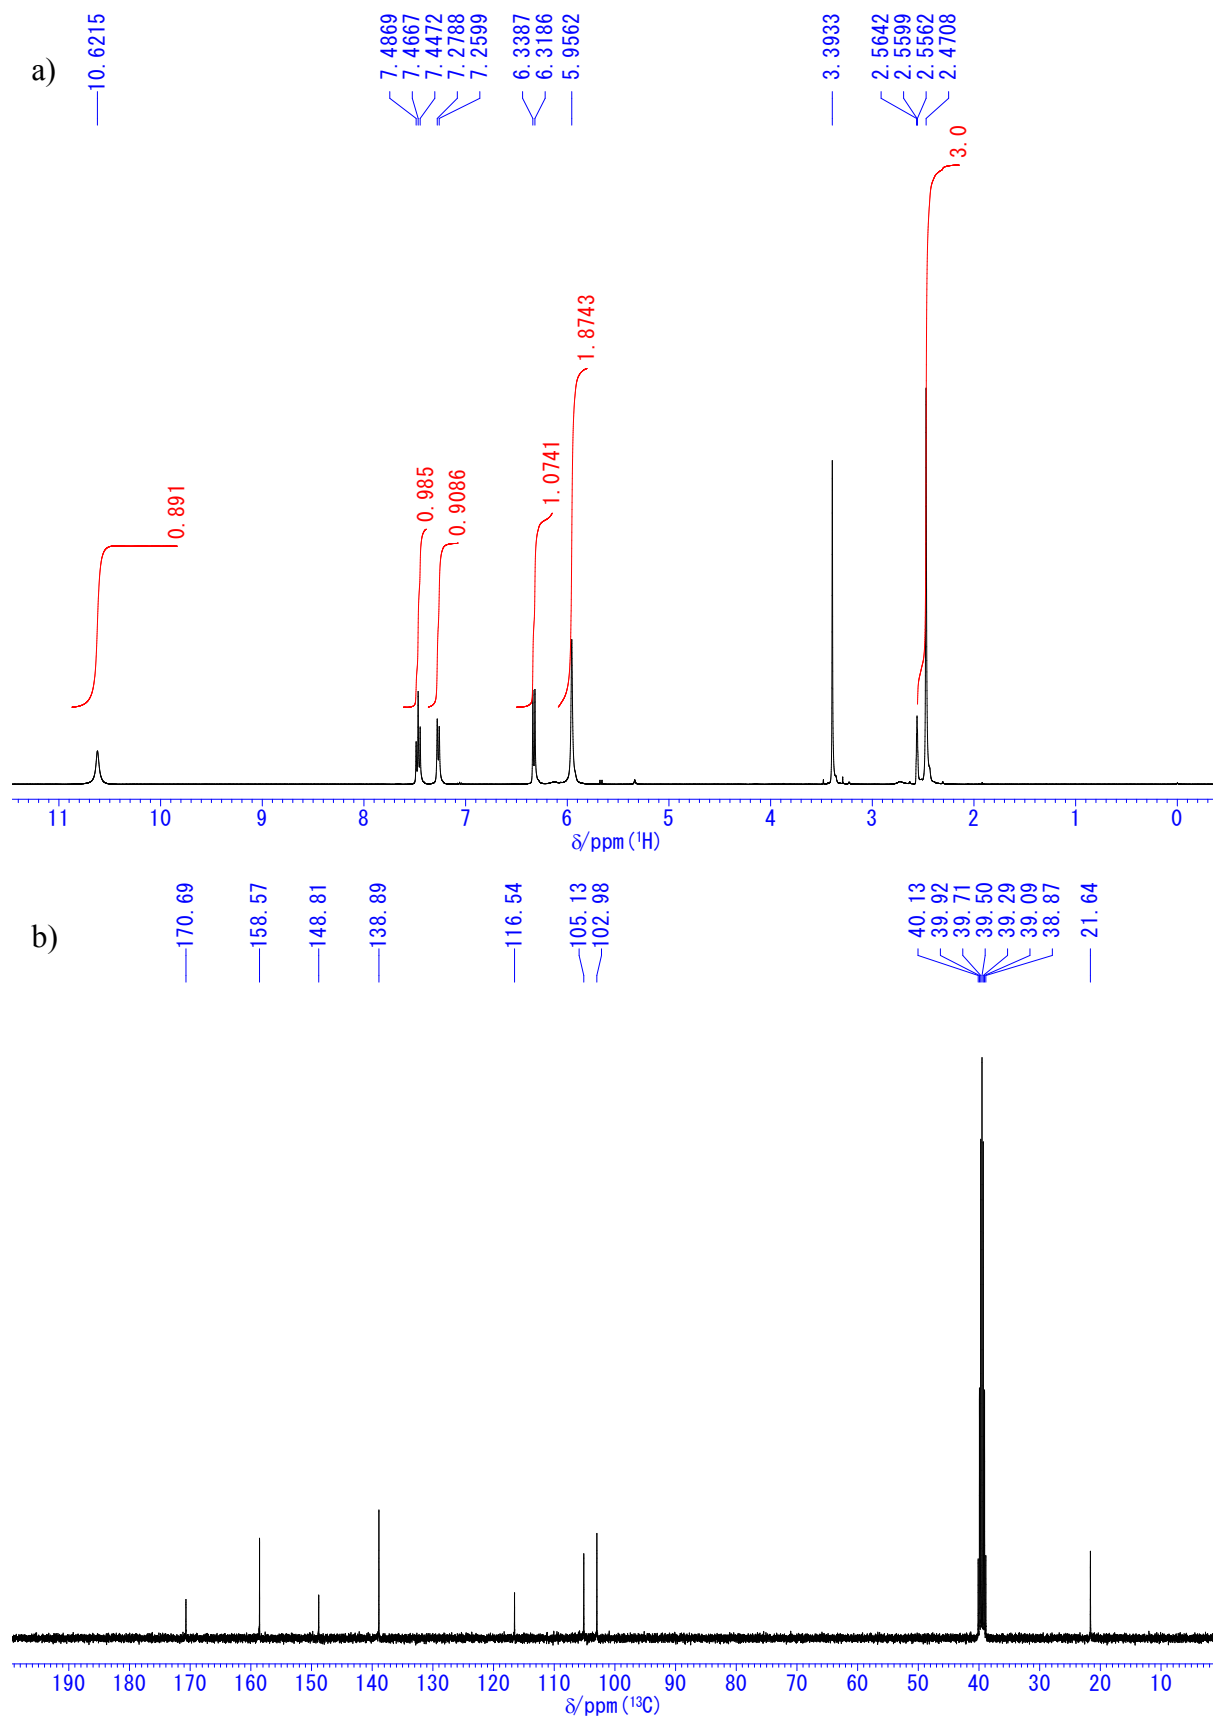

Figure S1. a)  $^1\text{H}$  and b)  $^{13}\text{C}$  NMR spectra of **1**.

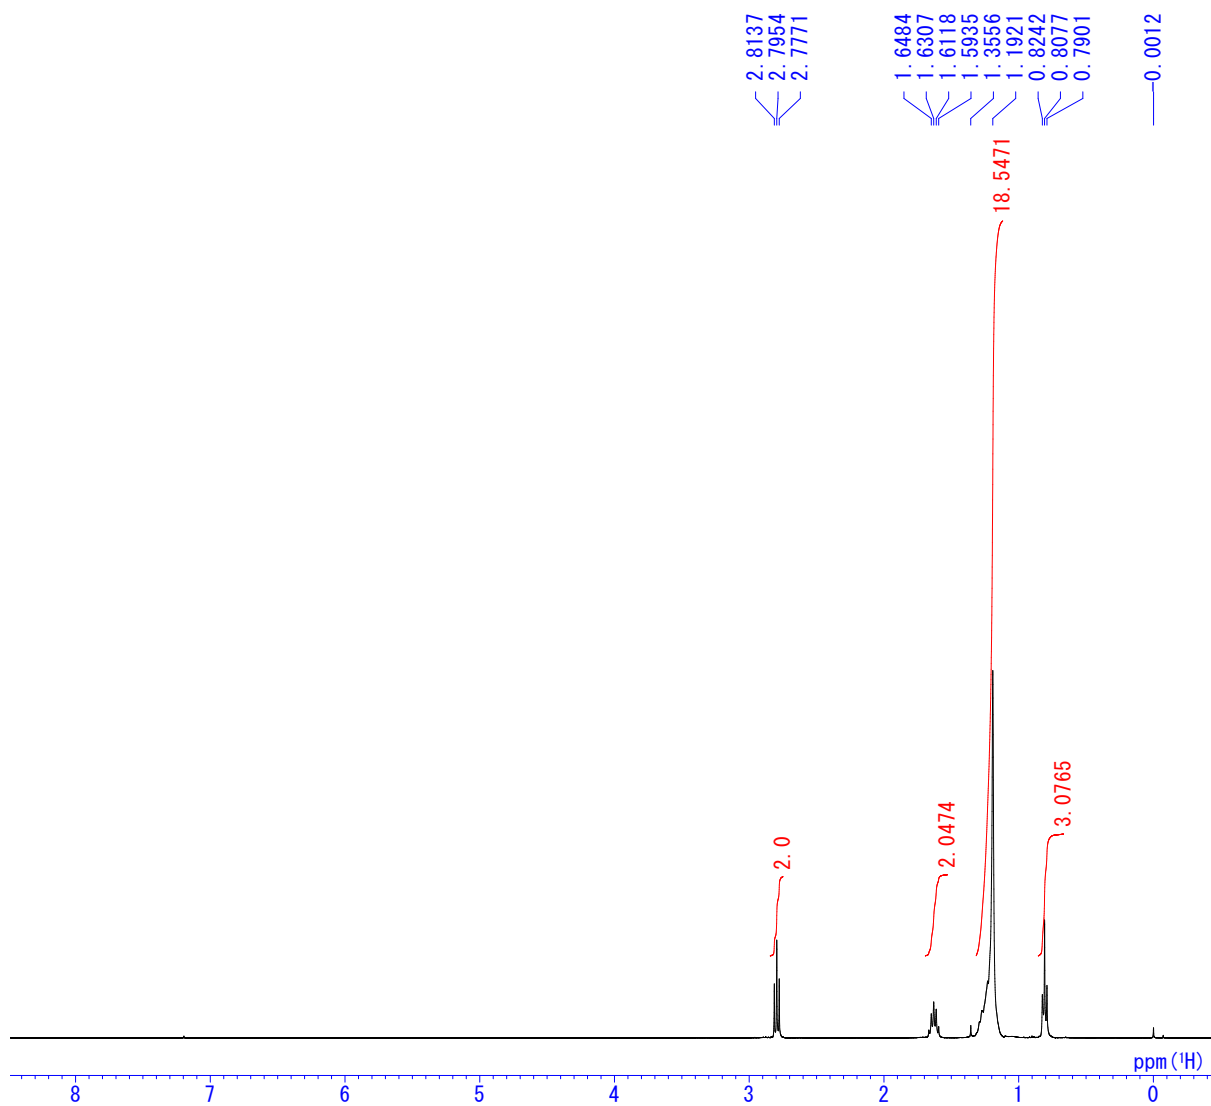

Figure S2.  $^1\text{H}$  NMR spectrum of **2**.

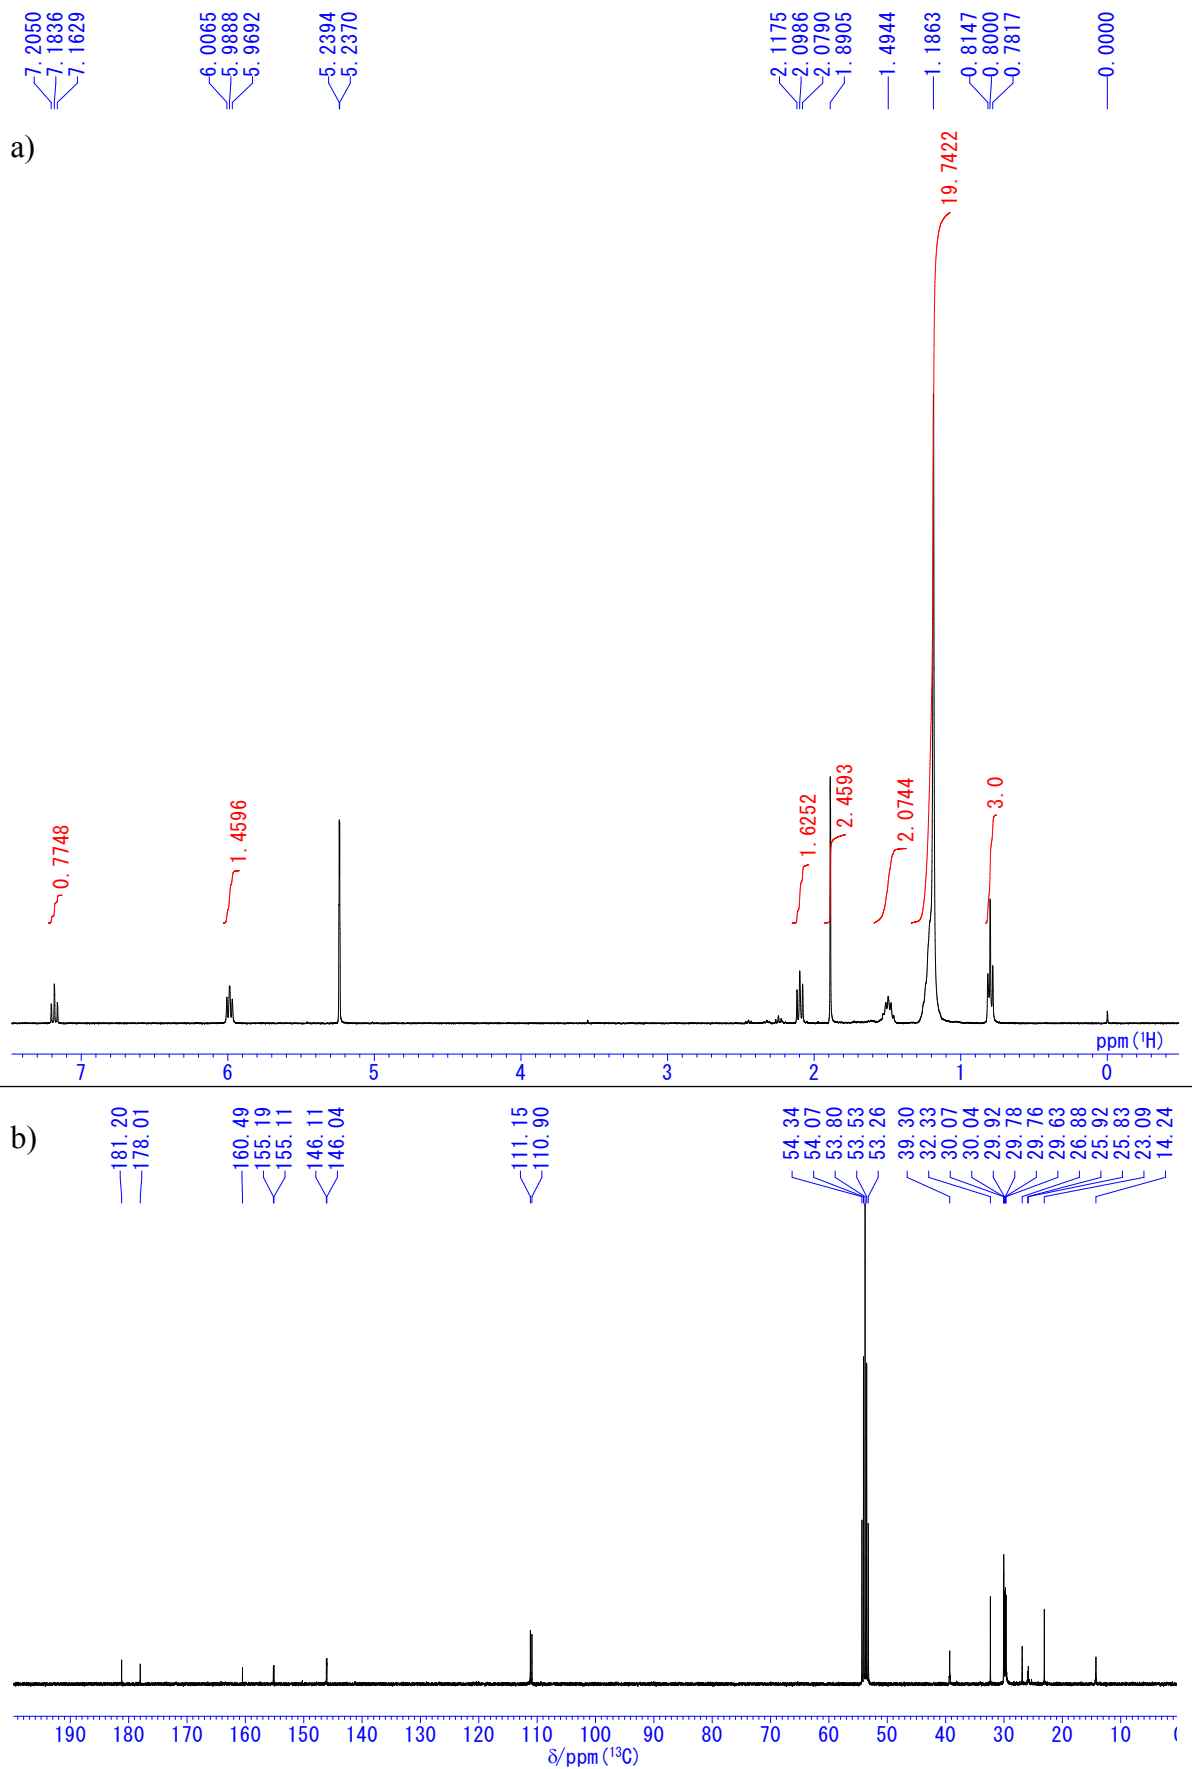

Figure S3. a)  $^1\text{H}$  and b)  $^{13}\text{C}$  NMR spectra of **3**.



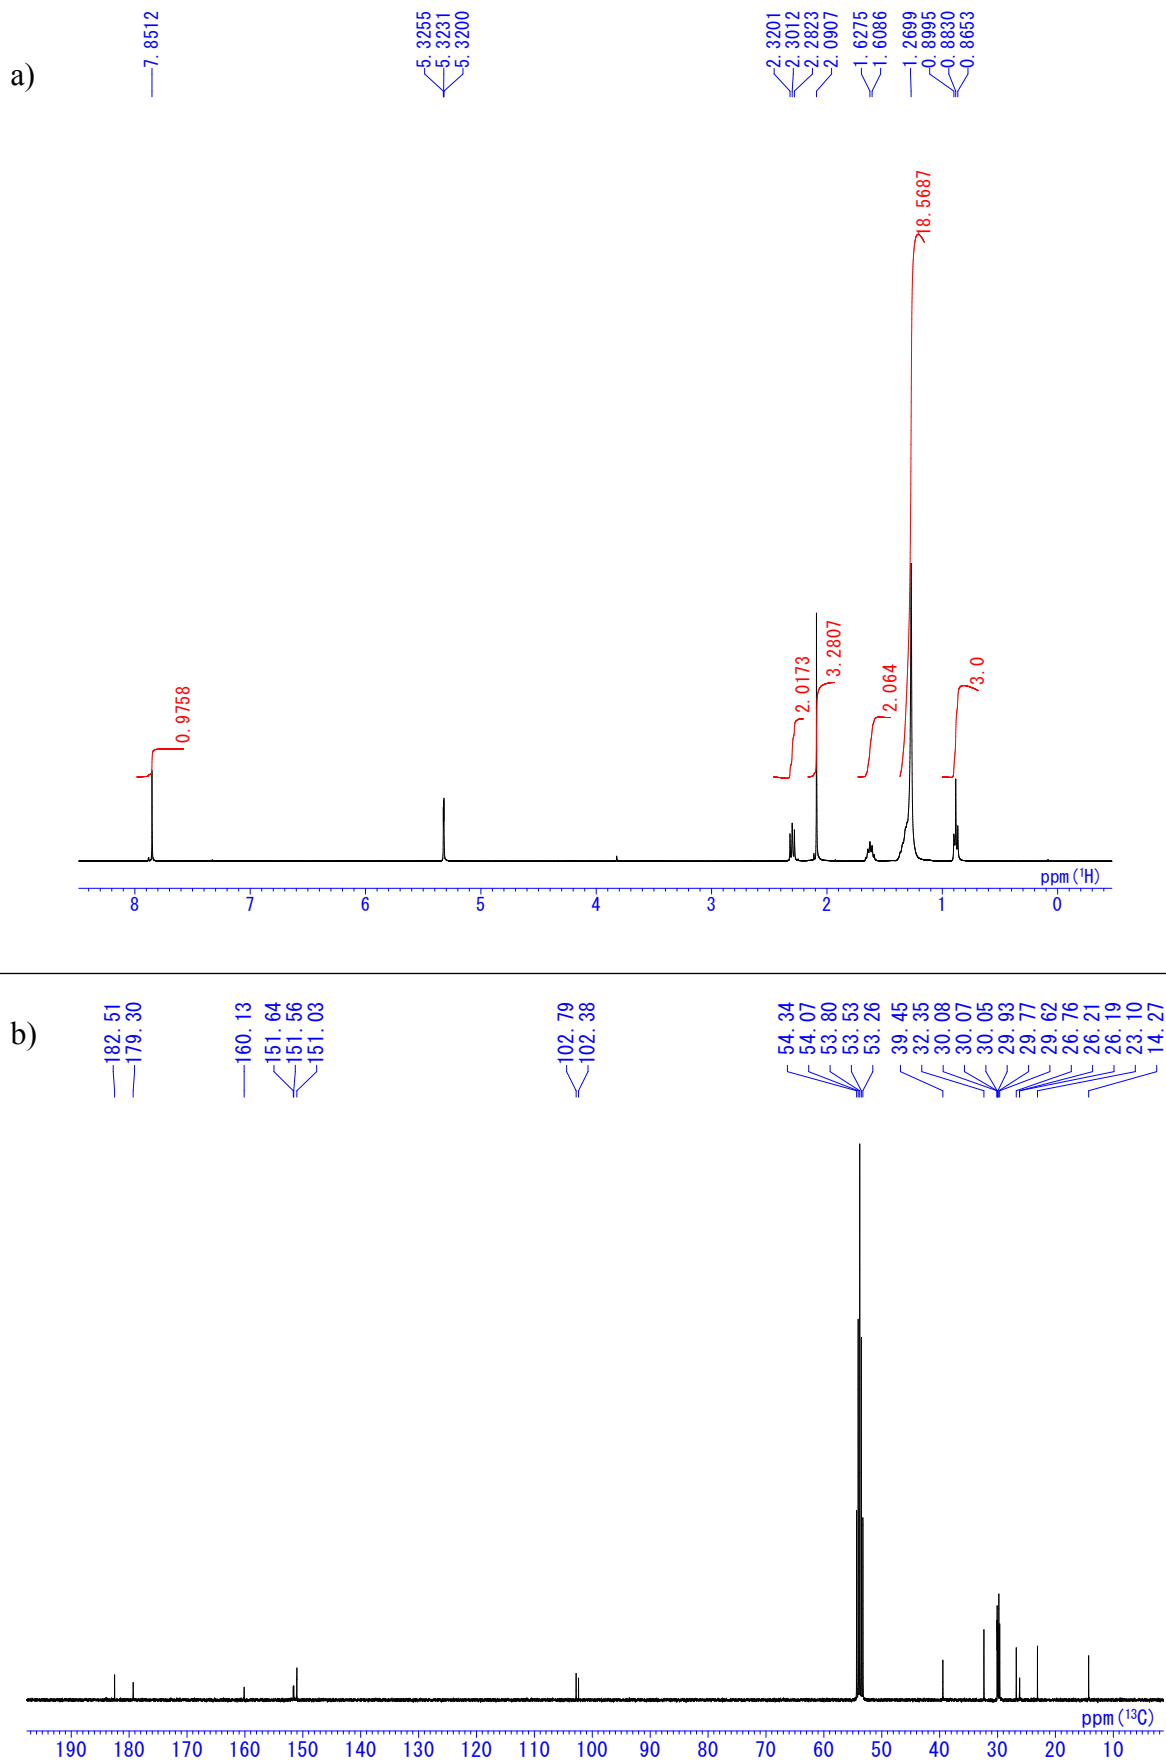

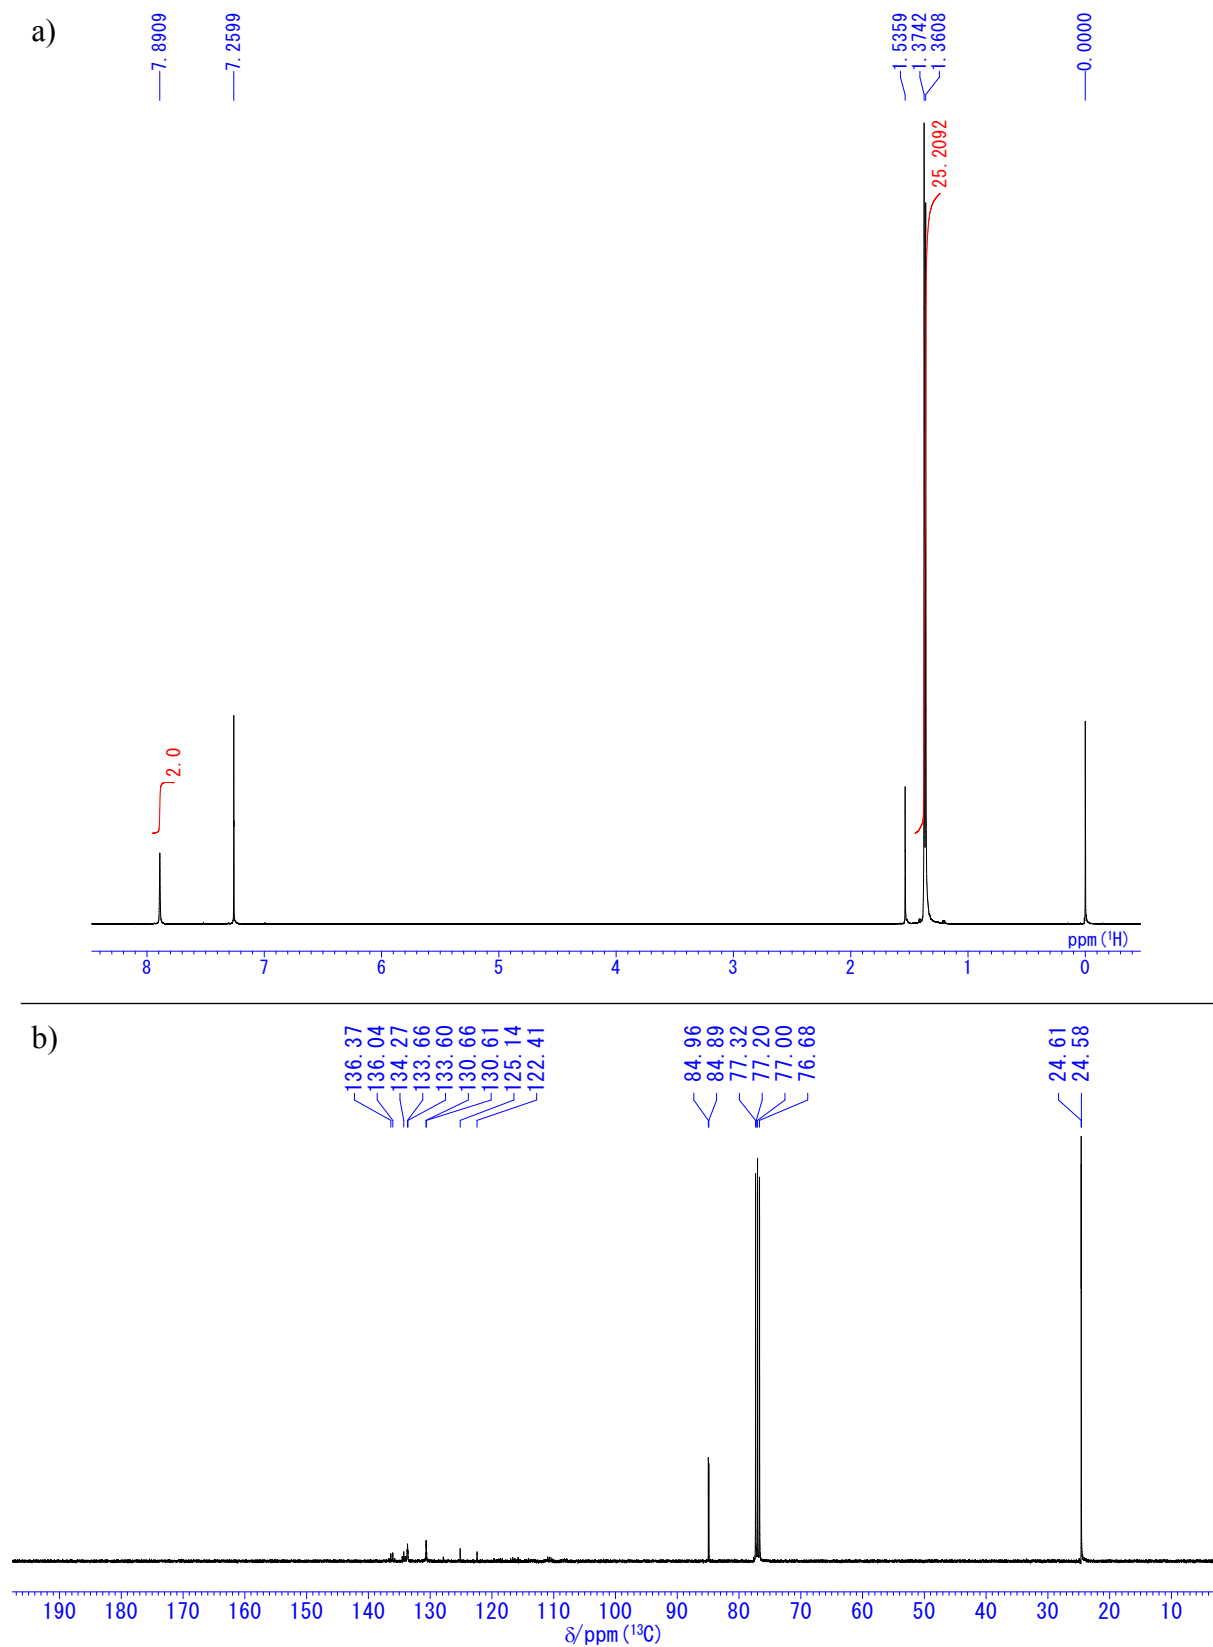

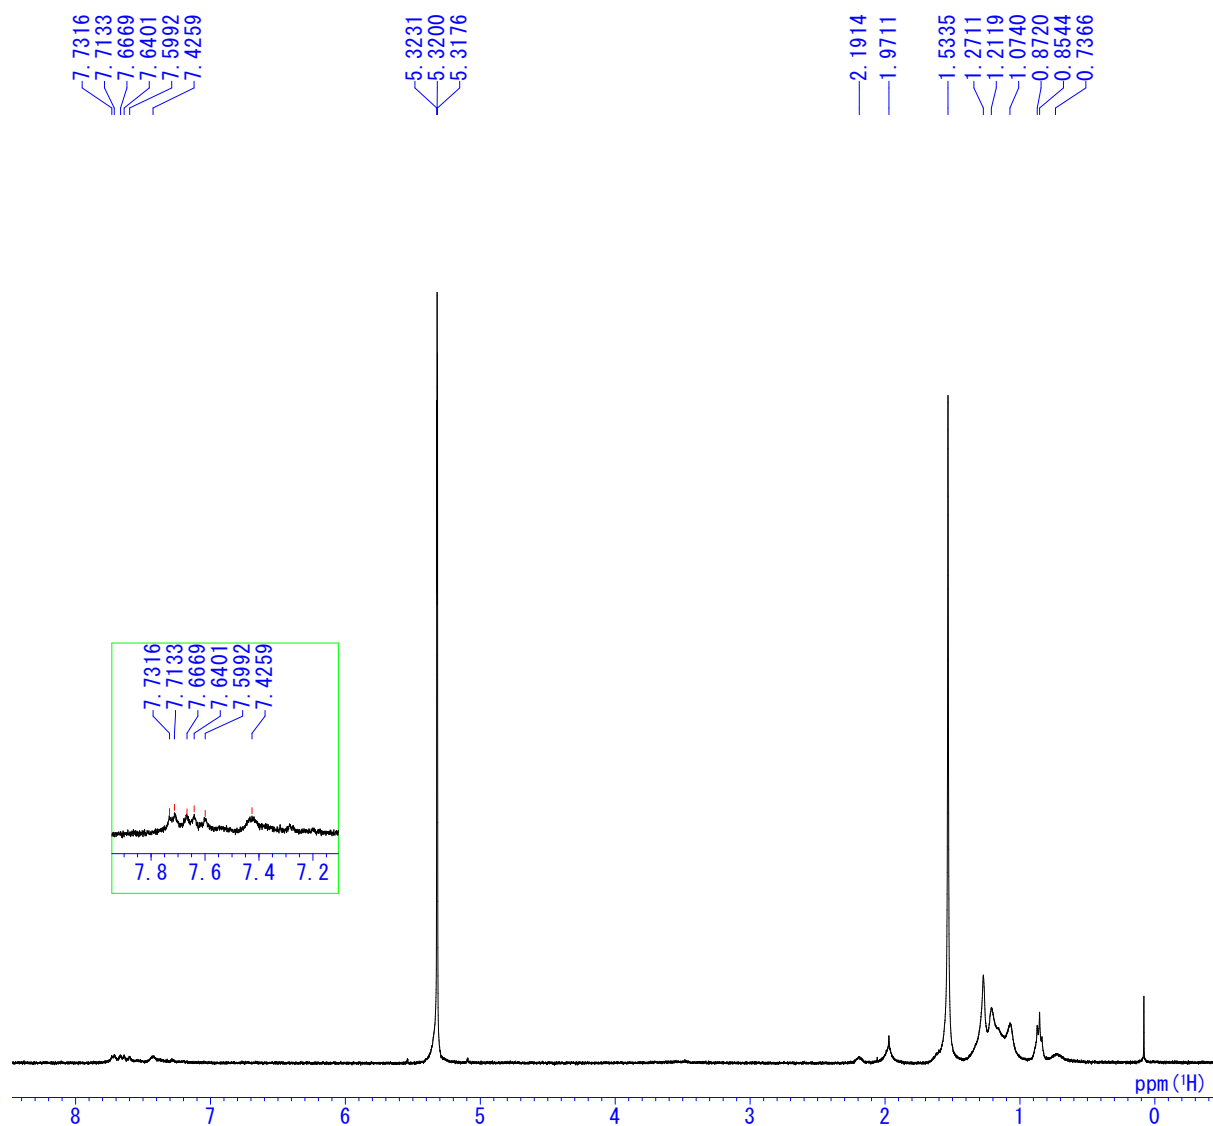

Figure S6. <sup>1</sup>H NMR spectrum of 5AP-co-FL.

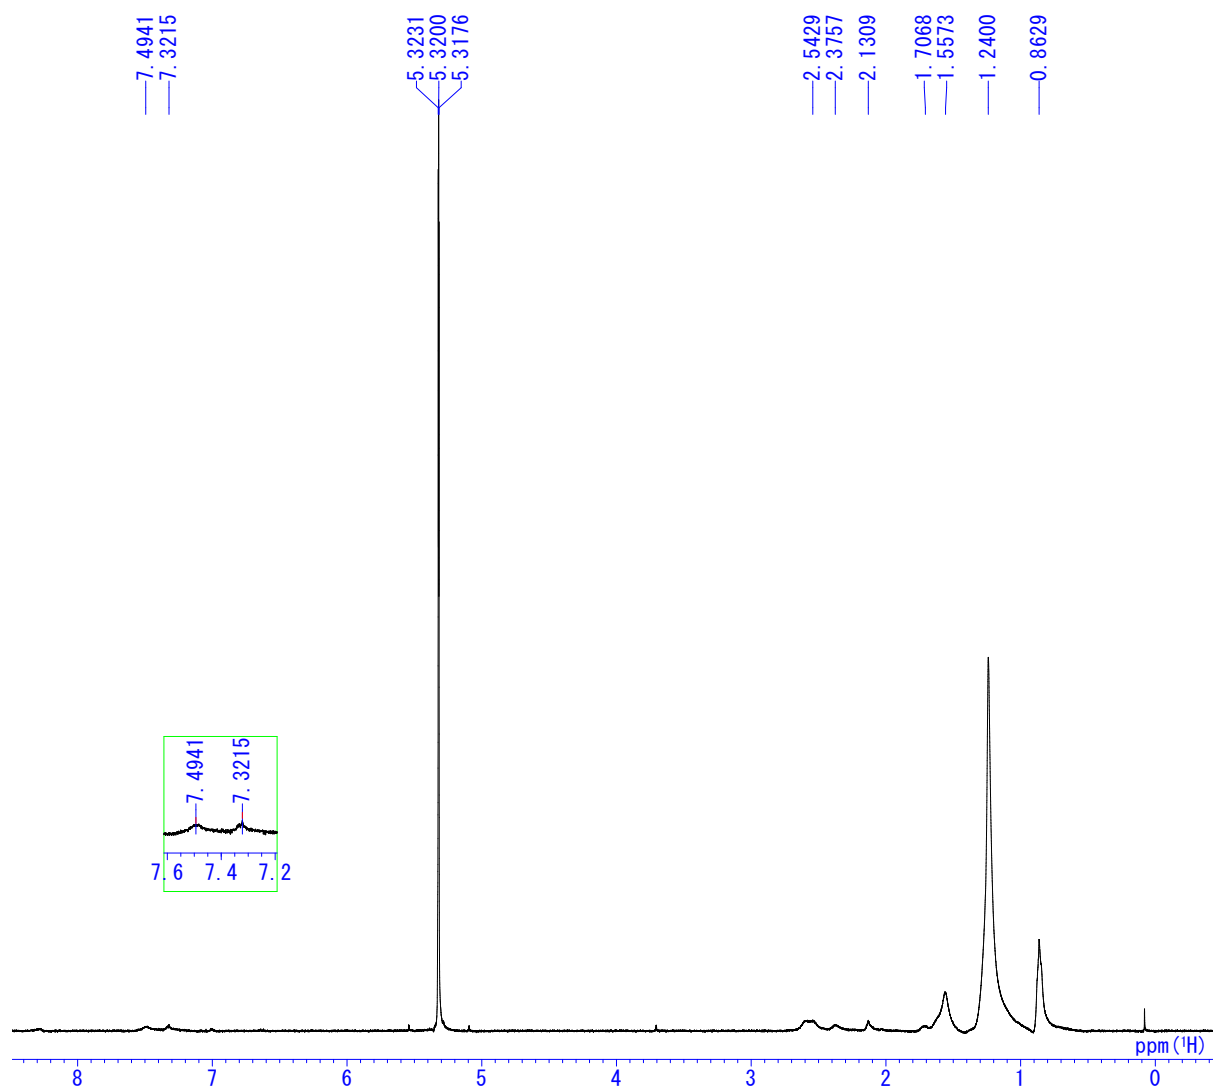

Figure S7.  $^1\text{H}$  NMR spectrum of 5AP-co-Bithio.

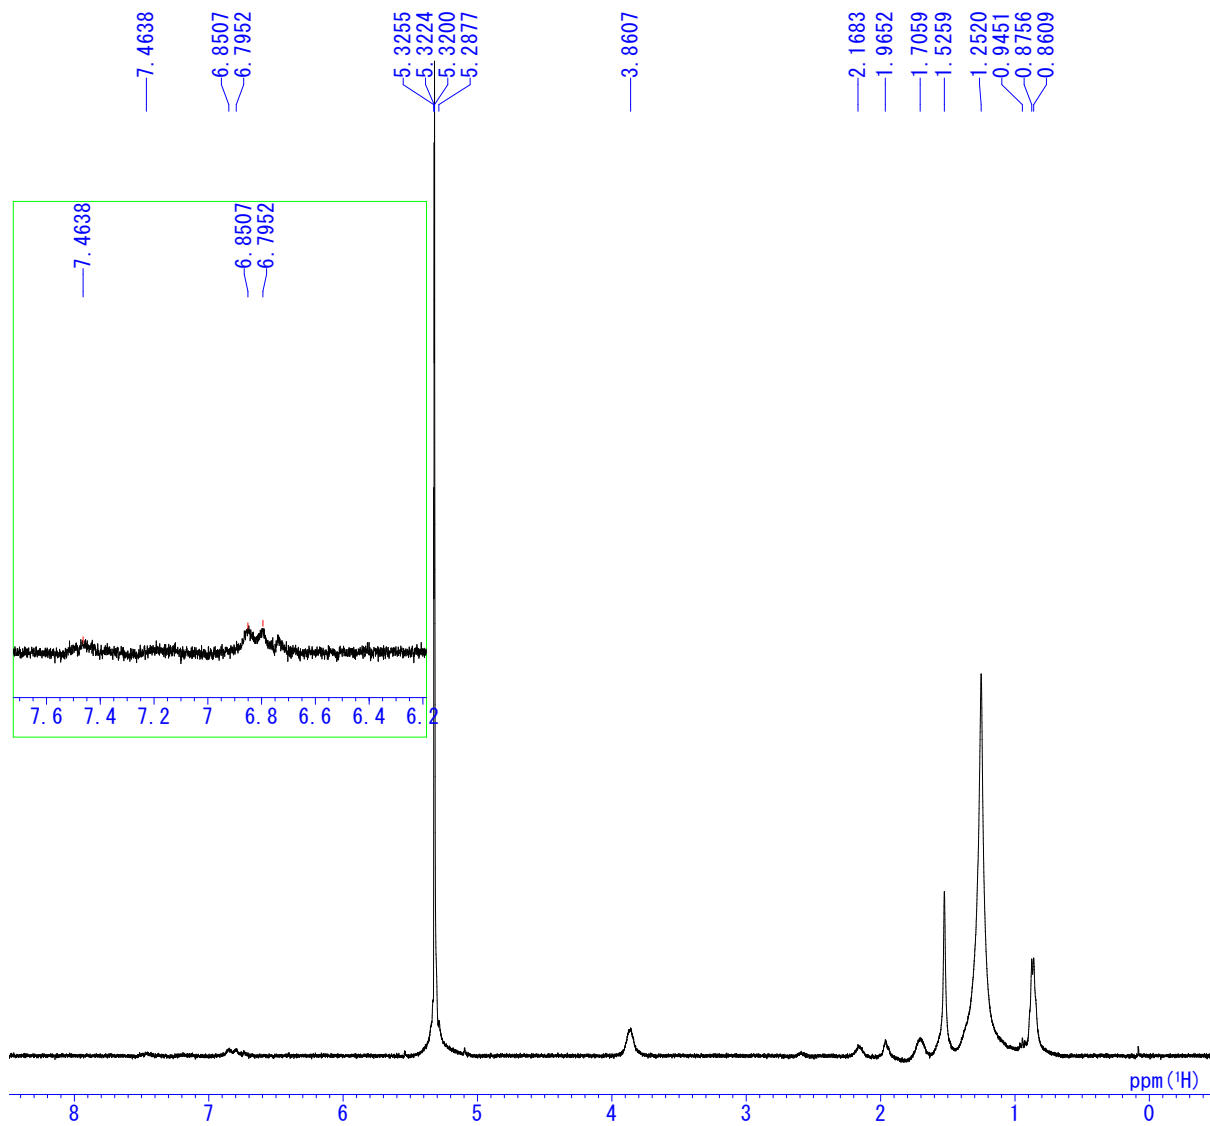

Figure S8.  $^1\text{H}$  NMR spectrum of 5AP-co-OC10.

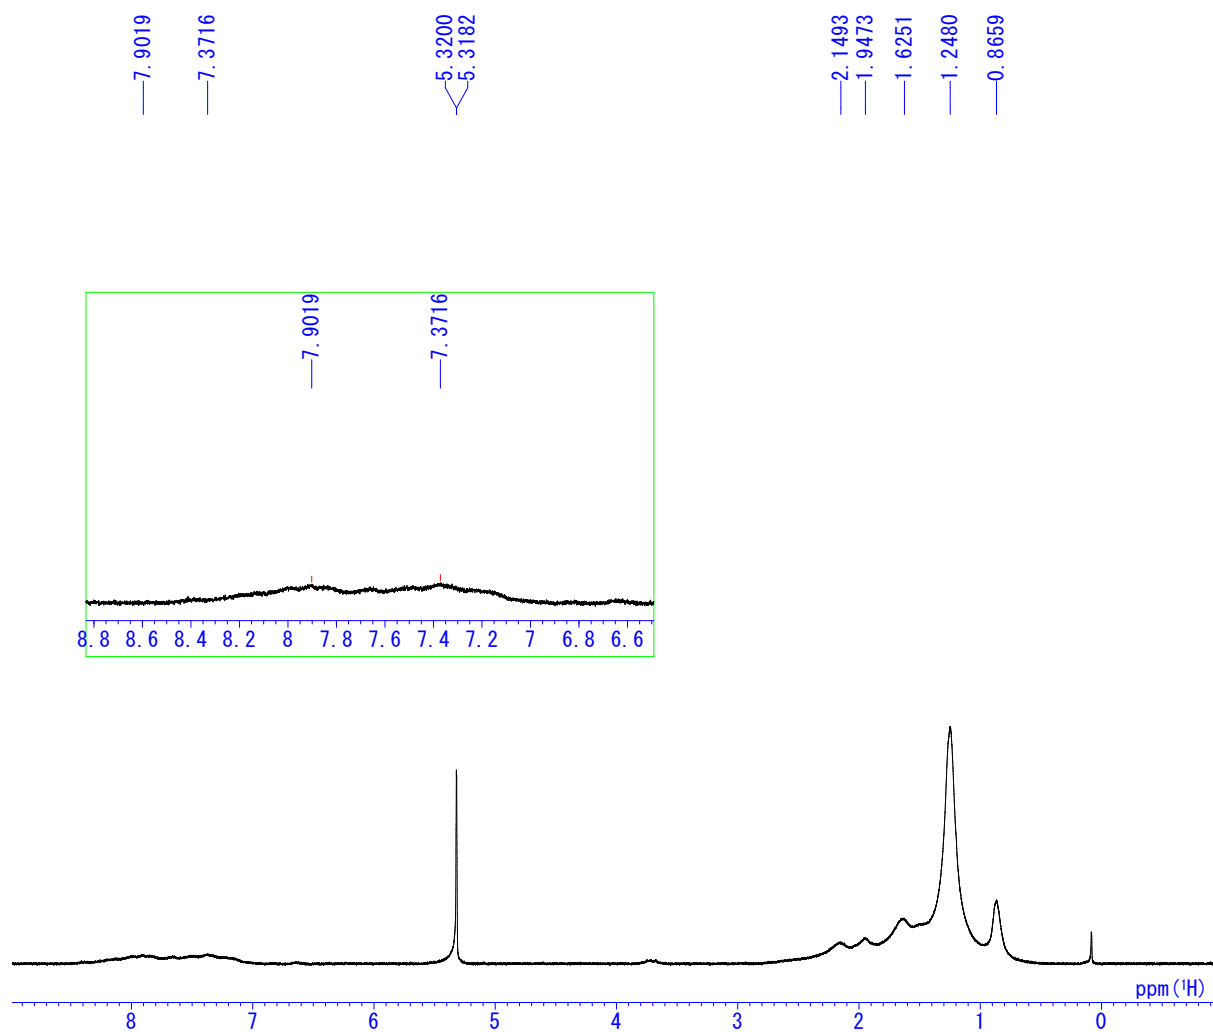

**Figure S9.**  $^1\text{H}$  NMR spectrum of 5AP-co-BThZ.

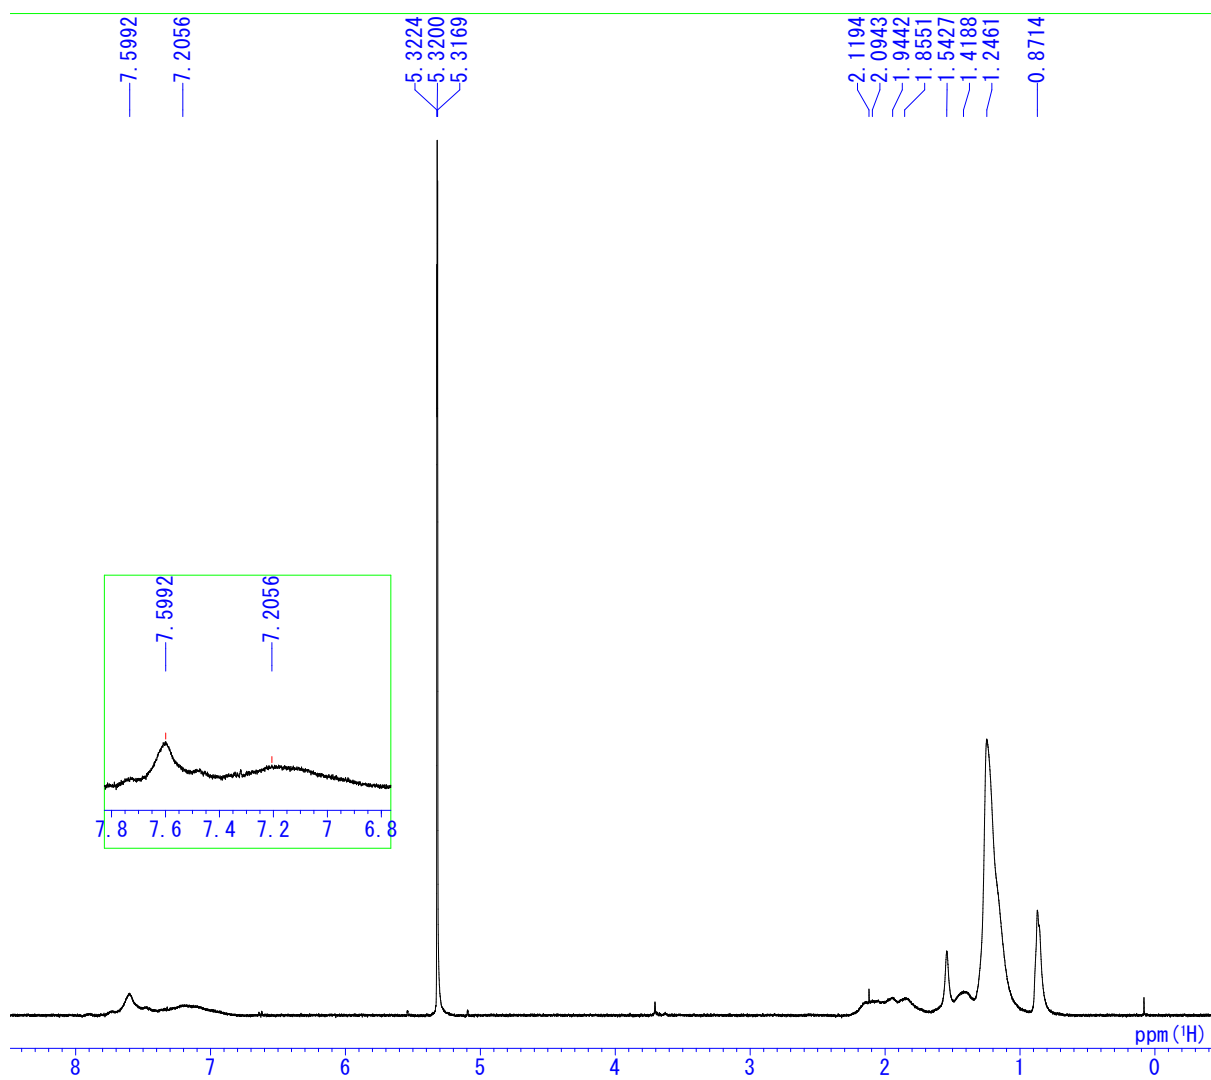

Figure S10.  $^1\text{H}$  NMR spectrum of 5AP-co-CF<sub>3</sub>.

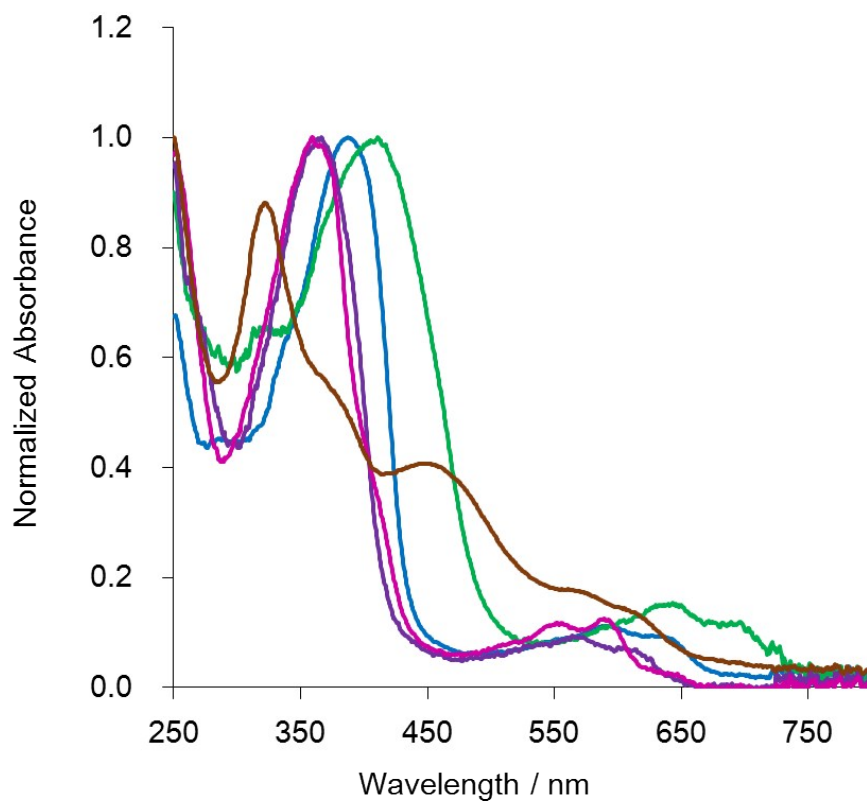

**Figure S11.** UV-vis absorption spectra of the polymers in the film states (prepared by spin-coat method from  $1.0 \times 10^{-3}$  M chloroform solutions).



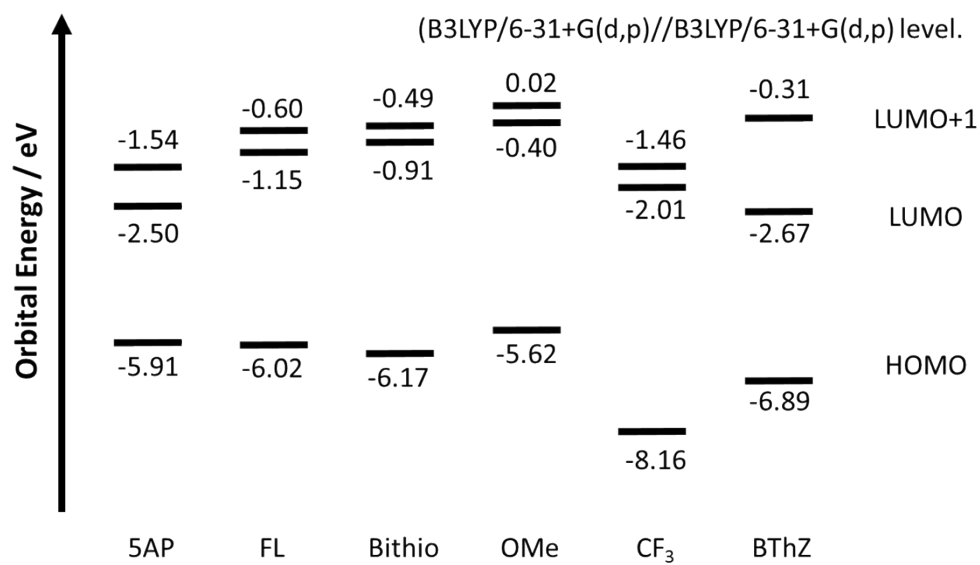

**Figure S12.** Calculated energy levels of 5AP and each comonomer unit. Long alkyl chains were replaced by methyl groups.
